# Supplementary material for: Identification of QTLs for rice grain size using a novel set of chromosomal segment substitution lines derived from Yamadanishiki in the genetic background of Koshihikari
Source: PubMed Central journal article supplement — Breed Sci. 2017 Sep 6;68(2):210–8. doi: 10.1270/jsbbs.17112 (PMC5982188; doi:10.1270/jsbbs.17112), 2017-09-06
Supplement: 68_17112_2.pdf [file 68_17112_2.pdf]

Supplemental Table 1. The 125 DNA markers used for selecting CSSLs

| chr. | Marker name             | IRGSP1.0 position | Forward primer                  | Reverse primer                 | Method   | Enzyme           |
|------|-------------------------|-------------------|---------------------------------|--------------------------------|----------|------------------|
| 1    | aa01000007              | 35,239            | ACTGAGTGCAGTACTTGTGGC           | GTCCCATTCCTCCGCTGCATATT        | CAPS     | <i>Xsp I</i>     |
| 1    | RM8068                  | 1,660,242         | AACTACTCCGCTGTAATTAG            | TGAACATTTATTGATATGGTAAA        | SSR      |                  |
| 1    | RM6451                  | 4,797,266         | TATGACATTGACCGTGGGC             | TCTCCCATGTTTGATCCTC            | SSR      |                  |
| 1    | ac01000670              | 8,036,400         | GCTATATTTGTCACGTGAAATCAAGC      | GAATGTAATATGTACTGGTGAACCGTCTA  | dCAPS    | <i>Xsp I</i>     |
| 1    | aa01005640              | 10,971,527        | TTTCTCTAGTGCACAAGTATGTCATGCT    | TGCATGATAAACTTAGAATATAGGAACCCA | dCAPS    | <i>Xsp I</i>     |
| 1    | aa01006150              | 15,231,386        | GTTCACCCCTACGCTAGC              | GCCGGTTGCGCATGTTAC             | CAPS     | <i>Bgl II</i>    |
| 1    | aa01006249              | 16,727,125        | GGGCGCAAGAAGGATGGG              | TAGTGGCCTTCTCAGGGACC           | CAPS     | EcoRV            |
| 1    | aa01006770              | 19,890,642        | GATGTGCATTTGAACCTTAATCAATTCAT   | GTATTGTAAGTTTTATGGTCCCCACGCGA  | dCAPS    | EcoRV            |
| 1    | aa01006903              | 22,112,410        | GGTAGGAGAAATACCGCCACC           | TCCAGCACTTGTCTGAGGTT           | CAPS     | <i>Afl III</i>   |
| 1    | RM7202                  | 26,203,636        | AACGTGGAGGCTCCTTTTTTC           | TTGCTATTAGTTGGTGGGGC           | SSR      |                  |
| 1    | RM246                   | 27,336,246        | GAGCTCCATCAGCCATTCAG            | CTGAGTGTCTGCTGCGACT            | SSR      |                  |
| 1    | RM8085                  | 34,863,114        | TGCGTTTCGATTTCTTTTA             | GGAAAGTTGTGTTCTTTGGC           | SSR      |                  |
| 1    | RM5448                  | 37,398,380        | GGGGCCCTTAGAGTTTTTAC            | CTGTACAGGACAAAACCCAG           | SSR      |                  |
| 1    | RM3523                  | 39,824,122        | CGTCTCTCGTCGATCCTTAGC           | CGAGGATATGGAGCGCAAGAG          | SSR      |                  |
| 1    | RM8136                  | 42,927,329        | ATGTAAGCTAGGTAGAGCTG            | GCGTACGTACGTAAGTAATA           | SSR      |                  |
| 2    | aa02000022              | 576,767           | GAAGTCTCCAGCACTGAGGC            | GAGACTTACAGCAGCCACC            | CAPS     | <i>Pst I</i>     |
| 2    | RM5345                  | 4,206,392         | CAGATACCCCGCAAAAAGG             | CGGACCCCAAGAAAGAAAG            | SSR      |                  |
| 2    | aa02000715              | 6,104,069         | GACTACCGCACATGTATAGGAGTC        | GATTAAGTGACGCACGCGGG           | CAPS     | <i>Bcl I</i>     |
| 2    | aa02000772              | 9,597,460         | ACACATTAATAAGATGCCACG           | TTTTGGTGTACGACGATTGC           | dCAPS    | <i>HpyCH4IV</i>  |
| 2    | RM1313                  | 11,262,999        | TGTGTCTGAAAACCAAGGGG            | CGTCAAGCTGTTCTGTTCTC           | SSR      |                  |
| 2    | ab02000375              | 18,766,399        | GGCATGTAGTACAAC TGCCCT          | ACGATACCTCAAGTGCGATGG          | CAPS     | <i>Nde I</i>     |
| 2    | RM3762                  | 22,462,497        | GACGGGTACGCTACCGTAAG            | TCCCCCTCTAAAACCTAG             | SSR      |                  |
| 2    | RM5651                  | 23,574,244        | AAGAGAACATTTGGAATCCT            | TAACTGTGCTCTTGTGGT             | SSR      |                  |
| 2    | aa02002928              | 25,592,080        | CCTTCTGTTCCCGCCGATA             | GGAACCTGCACTGGCGAT             | CAPS     | <i>Bcl I</i>     |
| 2    | RM1342                  | 28,165,372        | AGAAACCAAGATGGGAGGG             | CTAGCCAGCTCTCCCTTTTG           | SSR      |                  |
| 2    | RM530                   | 30,538,116        | GCACCTGACCACGACTGTTTG           | ACCGTAACCCGGATCTATCC           | SSR      |                  |
| 2    | RM5472                  | 30,643,103        | CACCAAGACACGACTGTACG            | CGGCACGTCATTGTAGTGAC           | SSR      |                  |
| 2    | aa02003577              | 32,133,628        | ATCACCCACACATTCGCTG             | CGATAGCGTAAACATAGGCCGT         | CAPS     | <i>Hpa II</i>    |
| 2    | RM3542                  | 35,144,500        | CTCCATGAAAAGCTAGCCAG            | AATCACCTTTCACTGGCTC            | SSR      |                  |
| 3    | aa03000001              | 198,008           | CTGAGTCAAGCCAGTTGGACC           | CCACATAGACGCCACGCTACG          | CAPS     | <i>Dra I</i>     |
| 3    | aa03000455              | 2,196,417         | GGGAGGAGGAGTAGATCGGG            | TCGGTAAACCAACTGGGAC            | CAPS     | <i>Pst I</i>     |
| 3    | RM3864                  | 5,860,933         | AGTCAACCTTGGGGGTAAGG            | AGATACTGCCCTGTCTATCC           | SSR      |                  |
| 3    | RM3461                  | 8,350,161         | AAAGTCTCCCTGTTGTAGCC            | CATGAACGTAAGCAAACG             | SSR      |                  |
| 3    | aa03000871              | 14,283,311        | TGCCGACTACATGATACCTCCC          | GAACATTCGCAAGCCCTGAAAG         | CAPS     | <i>Dde I</i>     |
| 3    | aa03002153              | 19,543,200        | AATCACCTCTGACTCG                | GCCAGCAATCAGTCATCCT            | CAPS     | <i>Pci I</i>     |
| 3    | RM3513                  | 25,114,637        | TACTCTATCCTGCCATGGC             | TGTAGTAGACGAGAGGCCGG           | SSR      |                  |
| 3    | RM6329                  | 28,811,876        | CCCTGGATGAAAAGCACAAG            | GAAGTTGTAGATGCCCATC            | SSR      |                  |
| 3    | Hd6_FNP                 | 32,363,542        | ACCTGGCAGCATGTTATGAC            | CTACAGATCCACAGAACAGG           | CAPS     | <i>Hin dIII</i>  |
| 3    | RM1038                  | 33,660,437        | TGGTTCGATTCGGATTTTC             | AAGCTATTCACAAGCAGCTC           | SSR      |                  |
| 3    | Hd16_FNP <sup>a</sup>   | 33,852,154        |                                 |                                | PCR-CTPP |                  |
| 3    | RM2187                  | 35,617,014        | GTCATTTGAAGTAAATCCGT            | GGTCTACTTGGCAAAATAAGT          | SSR      |                  |
| 4    | aa04000040              | 1,075,655         | AAACCTAACCTAGGCCCTGGATTACGGGCGC | CATTCTTTCAGTTACCTTCAGAAGAGCAGC | dCAPS    | <i>Hha I</i>     |
| 4    | aa04003724              | 8,271,354         | GCCTATGGTCTAGTAGCCACC           | CCGTGAAGCTGAGATCATGGT          | CAPS     | <i>Acc I</i>     |
| 4    | RM1359                  | 20,032,598        | AACGAATCTATTTTGGCTC             | TTCTTCTCAGTTCAATTCGC           | SSR      |                  |
| 4    | RM3524                  | 22,893,828        | CGGAGCTGGTCTAGCCATC             | GTCCTCGTCTTCTCACTCG            | SSR      |                  |
| 4    | RM1388                  | 25,220,380        | TTCAATGAGGCAAAGGTAAG            | ATTGTAGCTTGGACTAGGGG           | SSR      |                  |
| 4    | ab04001194              | 26,796,353        | CGACCTTAGGGACGTGACT             | CGGAGATCGATTCTAGGGCC           | CAPS     | <i>Afl III</i>   |
| 4    | RM5503                  | 30,363,699        | GGGAAGAAGATAGGAGATGG            | CTCTGGGTACACTTCACGAG           | SSR      |                  |
| 4    | RM349                   | 32,684,626        | TTGCCATTCGCGTGGAGGCG            | GTCCATATCCCTATGGTCTG           | SSR      |                  |
| 4    | RM1272                  | 35,296,066        | TCTATGGATCTGCATGCTGG            | CTGCCCTGTCTTTTAAATCG           | SSR      |                  |
| 5    | RM1248                  | 94,011            | ACAAGCAGCTAATGGTTGGG            | GTGATTTTTGGCTCAGGTCAG          | SSR      |                  |
| 5    | ac05000101              | 7,480,964         | CGGTGGCATGATTTATATCCATTATCTAAT  | AAATTTTATAGTCCCGTAGCGTTAGCATCG | dCAPS    | <i>Taq I</i>     |
| 5    | ab05000119              | 9,316,830         | CGTATAGGCCAAAAGAAGCAGGT         | TCGTCTCTCTCGATAGCACAAA         | CAPS     | <i>Hpy188I</i>   |
| 5    | ac05000153              | 14,774,503        | TGCTTGGTGCTATAGTCTGC            | CTATCGCCAGACACGTTGGAG          | CAPS     | <i>Mbo I</i>     |
| 5    | RM430                   | 18,753,970        | AAACACGACGTCCTGATC              | GTGCCCTCCGTGGTTATGACC          | SSR      |                  |
| 5    | RM5592                  | 22,115,574        | GTAACGCTTATTAACGATAA            | ATATTCTAGAACGAGGGTAG           | SSR      |                  |
| 5    | RM3476                  | 23,906,612        | GATTTCTCGTGAATCAAGA             | ATCCACGGTTAAGATAAATG           | SSR      |                  |
| 5    | aa05000868              | 26,835,497        | CCATGGAGGGTGAAGAACGG            | CACCAATTTGTCCGACCACT           | CAPS     | <i>Bsp 1286I</i> |
| 5    | aa05001022              | 28,904,853        | GCGAGGATGAGCTTTCTCTTGA          | GCACAACAGAGTAGCACTTCC          | dCAPS    | <i>Hpy188III</i> |
| 6    | aa06000004              | 397,429           | TGGTATCTGAACAATTTAAACAATGAATG   | CAAAATCTAAACTTTGGTGTGAACATAACC | dCAPS    | <i>Xsp I</i>     |
| 6    | RM1369                  | 1,563,657         | CAATTGGCCAAAGGTCGT              | GCGGATTTCAAGATCTTGGT           | SSR      |                  |
| 6    | Hd17_FNP                | 2,234,192         | ATGGCTTGTCCCTGTCACCCTCTCT       | CCCATATGTTGGGCTGATG            | dCAPS    | <i>Bst XI</i>    |
| 6    | ab06000075              | 5,344,224         | TGTACCGAGTACCCACACGA            | AATTGGCGACTCTGCGAGGAG          | CAPS     | <i>Sma I</i>     |
| 6    | RM2615                  | 5,960,082         | CAGAGTGTCTTTAGACAATCA           | AAATTTGGTAAGAGATTTGCG          | SSR      |                  |
| 6    | RM5585                  | 7,606,869         | TCAGAGGTGGCAGCTTATTTTATACC      | ATGTAATGGTACACACACACACAC       | SSR      |                  |
| 6    | RM2523                  | 8,920,014         | CCGTAGGTTCTCAAGTGATA            | GCAAAACCGAATAAAAATTA           | SSR      |                  |
| 6    | ac06000592              | 11,844,371        | GCCAACGATGCATCAGTGATAC          | TCTAAAGGCTAAAAGTCCCTGGCG       | CAPS     | <i>HpyCH4IV</i>  |
| 6    | ab06001118              | 17,240,935        | AGAGCGACGACATCAACACC            | AGACGTGCCGGATCTAGACA           | CAPS     | <i>Bsm AI</i>    |
| 6    | RM1340                  | 23,344,226        | TCCAACCTAGTGGGAACGC             | CTCAACGCCATGAACCTC             | SSR      |                  |
| 6    | aa06000951              | 25,865,811        | CCAACCGACACTCAATTTCA            | CAGTTGCCGGTGAAGAAGACT          | CAPS     | <i>Xsp I</i>     |
| 6    | RM1370                  | 28,533,532        | AAACGAGAACCAACCGACAC            | GGAGGGAGGAATGGGTACAC           | SSR      |                  |
| 6    | RM5753                  | 30,967,924        | AACATGTCTCAACTTCTGGGC           | GCTAGTACGATCCAGCTGC            | SSR      |                  |
| 7    | aa07000004              | 1,017,334         | GGGTAGCTAATCATCTGAGACCA         | GCTCGCTTGTGTTAGCTTCTCC         | CAPS     | <i>Dra I</i>     |
| 7    | RM8010                  | 4,166,570         | GAGCCACTGCTATATAAAGC            | ACCAAAATCCAACTTTGTA            | SSR      |                  |
| 7    | RM8006                  | 7,686,234         | TGCGGGTTCTTAATTTTATC            | AATGGTCCACATTAATCCAC           | SSR      |                  |
| 7    | ab07000446              | 8,883,010         | CAGAACGACGAGTGGAGAGG            | TCTCTCGCTGCTCCATTGTG           | CAPS     | <i>Xsp I</i>     |
| 7    | RM8036                  | 14,637,706        | AGCAGAGCAATTTAACTAAG            | GCCTATCATAATATCCATCA           | SSR      |                  |
| 7    | RM1279                  | 21,615,000        | GGGTATAAAATGCGTGGCAC            | ATGGATGGTACGAGGACGAG           | SSR      |                  |
| 7    | aa07005234              | 24,146,716        | AGTCGCTGATATGTTGGGCTCA          | CATCGACTACTGGTCTAGAGTCCCT      | dCAPS    | <i>Hpy188III</i> |
| 7    | RM1364                  | 26,775,051        | AAGAAATCAAAAACACATGA            | AAAACATCTACTTTGATCCA           | SSR      |                  |
| 7    | RM1306                  | 28,947,976        | TGCCAATTACCTTCCCCTAC            | TGCTCCGATTGCTGTATG             | SSR      |                  |
| 8    | RM3819                  | 3,016,139         | ACTTCACTCTGGATCTTGG             | CAATCCCTTCTCTCTCC              | SSR      |                  |
| 8    | RM5556                  | 4,589,534         | ATCTCCCTCCCTCTCTCTAC            | TCCACACTTCAAGTTGAC             | SSR      |                  |
| 8    | aa08001325 <sup>t</sup> | 7,383,135         | TGAATACAGTTACTACCCAG            | AGAGGAGGAGGAAGTCAACAGA         | CAPS     | <i>Dra I</i>     |
| 8    | aa08001560              | 8,839,169         | CATGTGGTAGCTGTGCGGAC            | CCATCTCACTGCCAAGCTG            | CAPS     | <i>Dde I</i>     |
| 8    | RM2910                  | 16,945,565        | CAGTCTCATATTCATATA              | ATAAGGTACTTTCATCCGTTA          | SSR      |                  |
| 8    | RM7049                  | 20,815,151        | AACCTAGATCTAATCCGTGG            | CATCTCTGAGTTGAGCAAC            | SSR      |                  |
| 8    | RM5485                  | 24,072,950        | CTTCCACAAGCTTGGCTAGG            | AATGCCATCCCTACTCATG            | SSR      |                  |
| 8    | RM3155                  | 27,905,344        | AATCCACATTTGGCTTCTC             | CGTGTAACTGTTTCGCTTG            | SSR      |                  |
| 9    | aa09000002              | 1,742,371         | GTGCAGTGGATGACGCCCT             | CTCGAGGCTAGCTTTGGACC           | CAPS     | <i>Taq I</i>     |

|    |            |            |                                  |                                     |       |           |
|----|------------|------------|----------------------------------|-------------------------------------|-------|-----------|
| 9  | RM2855     | 3,839,880  | GGAGCTTAGAATCTCACCTA             | CGCATTTTCTATACATACA                 | SSR   |           |
| 9  | aa09000030 | 8,073,443  | TTAAAGAAAGGCTGATGGGAGCTTA        | CCGGACTAAAGGTGTCCTCA                | dCAPS | Ddel      |
| 9  | aa09000038 | 9,071,039  | GTGGGGTGCCATCAATTCAGCTTA         | GGCTCGAAGAATCGACTCAA                | dCAPS | Ddel      |
| 9  | ac09000231 | 11,753,935 | GCACCAGAATGCAACTGCTCATCACTT      | TCACTGCCCTTTCATTAGCCACA             | dCAPS | Ddel      |
| 9  | ac09000278 | 16,115,195 | CGTCTACTGTAGCTGCTGCTG            | CGACGACTCGTACACACCAA                | CAPS  | TaqI      |
| 9  | RM160      | 19,788,768 | AGCTAGCAGCTATAGCTTAGCTGGAGATCG   | TCTCATCGCCATGCGAGGCGCTC             | SSR   |           |
| 9  | RM215      | 21,189,620 | CAAAATGGAGCAGCAAGAGC             | TGAGCACCTCCTTCTGTAG                 | SSR   |           |
| 9  | RM2144     | 22,210,016 | ACATTATGAAAACGGAGGAAG            | GAAATGATGCATCAGCATT                 | SSR   |           |
| 10 | RM5271     | 1,936,630  | CGGTGTAGATTGTAGGTACA             | GTAGTTTAGTTATTGCGCAC                | SSR   |           |
| 10 | aa10001353 | 6,801,371  | CGCCACCCGCATAAGAAA               | AGTTGGGACCTCGAGTGAGT                | CAPS  | ApoI      |
| 10 | aa10001449 | 9,388,361  | GCGATTCTTAGACATTGCC              | GTCTCAGCTCCCTCCGC                   | CAPS  | BsrDI     |
| 10 | RM4455     | 11,737,240 | CTCTCAAAGAACTAGGACTC             | GAGAAGGTATGATAACCAAT                | SSR   |           |
| 10 | RM1083     | 14,677,003 | CCTTGATTGCAGCATCCG               | TTGAGCCTTTTACGAGACGG                | SSR   |           |
| 10 | RM6704     | 18,005,569 | CACACATTGCATTACGAGGG             | CAGGGGCAGCTTGAATACTG                | SSR   |           |
| 10 | RM5352     | 21,192,137 | GGAATAAACATGGTGCAAG              | ACCAGATCACATGAAGAGGA                | SSR   |           |
| 10 | aa10003607 | 22,389,675 | GGTTTGCAAGCGCTTGATCA             | GGCCACAATAACGTCTGAAGGA              | CAPS  | EcoRI     |
| 11 | RM1761     | 306,167    | ACGCTTAAAGAACATTGAT              | GCGATTAACCTTTAACCAAT                | SSR   |           |
| 11 | aa11000089 | 2,717,750  | GCCACTGCCTCTATGGATTG             | TCCTGCAACAGTTTTTCATCAGTGAA          | dCAPS | EcoRI     |
| 11 | aa11000115 | 3,282,952  | CTTACAATTGGACCCAGCAGG            | GACTTGTCTCGTAGCATCGGT               | CAPS  | Bsp1286I  |
| 11 | RM3625     | 6,669,050  | CTTGCAATTCAATTGCTTAC             | GGTGGCCTAGTGAACATAA                 | SSR   |           |
| 11 | aa11002722 | 9,053,289  | TTGAGTATGATTGCACTCAGAAAATATGG    | CAGTAGATGCTTAGAGAATTGTCAACAGCG      | dCAPS | HhaI      |
| 11 | aa11003294 | 15,388,528 | CTGCCATGCTACTGGGACCTGATTCTGCTGCA | ATCACAGATCAAACATGGGTAAAATGCGAAATGTC | dCAPS | PstI      |
| 11 | RM1341     | 20,143,256 | GAACCTGGGTGACGAGATCCTG           | ACCACCAGCAGCGTTTCTC                 | SSR   |           |
| 11 | aa11006712 | 24,455,971 | CCTCACGGTGCAGGTCATG              | CTTCGTACCAGCGTGATGTC                | CAPS  | MnlI      |
| 12 | RM1880     | 748,006    | ACCACTAAATAAGCACATAC             | GGCATCATACATTAATAAATAC              | SSR   |           |
| 12 | RM3747     | 2,305,433  | AGCAATGCACTCCCTTGATC             | TGTCTTCTCCTTGTTGG                   | SSR   |           |
| 12 | RM3455     | 4,920,662  | TGAATCCCACTCGCAGATC              | GCCAGTCCACGATTGGTC                  | SSR   |           |
| 12 | RM2529     | 7,567,768  | CATTAATAATCAGTGGGACTG            | AGGCATTTCTGATATGATC                 | SSR   |           |
| 12 | RM101      | 8,829,342  | GTGAATGGTCAAGTACTTAGGTGGC        | ACACAACATGTTCCCTCCCATGC             | SSR   |           |
| 12 | aa12004460 | 12,185,846 | GGCCAAGTCTTAGGTGAAG              | CCTGGAGCTGGAGTCCATTG                | CAPS  | Hpy188III |
| 12 | aa12004617 | 15,775,760 | GTGTTTGGCATCCCCTGTTT             | GGACTTGCATGATGACATGAC               | CAPS  | AclI      |
| 12 | RM2972     | 19,167,185 | GAGCCAATATGTTGCTTGA              | GTTCAGATCATGATGCCTAC                | SSR   |           |
| 12 | RM1986     | 21,246,578 | TAACGGAGGGAGTAGTTTTT             | GAACCTACATATCGAGAGCA                | SSR   |           |
| 12 | aa12005161 | 24,239,197 | GCTGGAGTGACGTGTACTACTAC          | TTAGCAGTTTTGAAGTGTGACGTAATCATG      | dCAPS | Hpy188III |
| 12 | RM2196     | 27,384,347 | ACTGAGAACTTTAATCATCG             | GAACAACCTTTGAAGAGAAAC               | SSR   |           |

<sup>a</sup>: The primers of *Hd16* \_FNP were Fin; CGACATTTTACAGGGGAACAATTAGATCCG, Fou; TGGAAAGAAGCATCATCTGGTCAGCATG, Rin; TACGACCTAAGTGGGCATGGACGCTCGT, Rou; ACCTGATACCCTTGCCAAGGTAATCTCCCT.

<sup>b</sup>: This marker showed Built5 position.
